# Supplementary material for: Exposure of the mosquito vector Culex pipiens to the malaria parasite Plasmodium relictum: effect of infected blood intake on immune and antioxidant defences, fecundity and survival
Source: PubMed Central journal article supplement (PMC5129600; doi:10.1186/s13071-016-1905-7), 2016-11-29

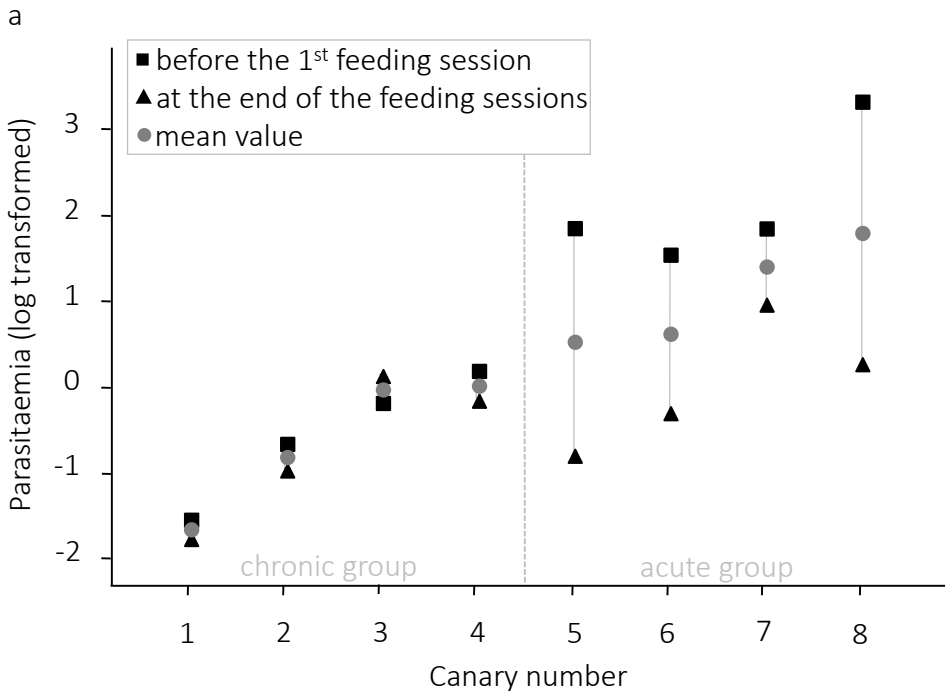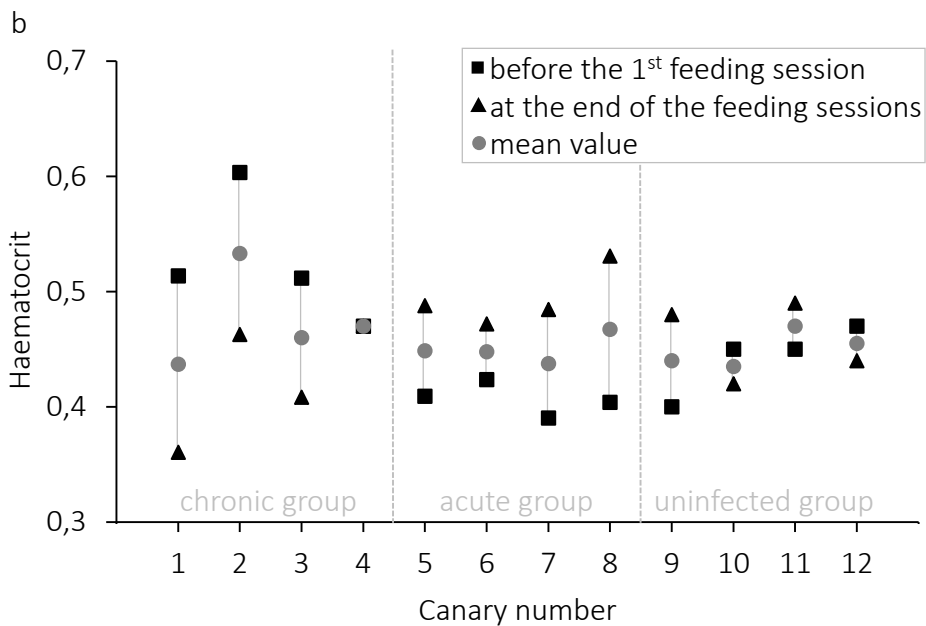

Supplement: 13071_2016_1905_MOESM1_ESM.pdf [file 13071_2016_1905_MOESM1_ESM.pdf]
